# Supplementary material for: A revised marine fossil record of the Mediterranean before and after the Messinian Salinity Crisis
Source: Copernicus journal article supplement (doi:10.5194/essd-2024-75), 2024-03-13
Supplement: Supplementary file [file essd-2024-75-RC1-supplement.zip]

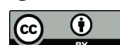

# A revised marine fossil record of the Mediterranean before and after the Messinian Salinity Crisis

Konstantina Agiadi<sup>1\*</sup>, Niklas Hohmann<sup>2,3</sup>, Elsa Gliozzi<sup>4</sup>, Danae Thivaoui<sup>5,6</sup>, Francesca R. Bosellini<sup>7</sup>, Marco Taviani<sup>8,9</sup>, Giovanni Bianucci<sup>10</sup>, Alberto Collareta<sup>10</sup>, Laurent Londeix<sup>11</sup>, Costanza Faranda<sup>4</sup>,  
 5 Francesca Bulian<sup>12,13</sup>, Efterpi Koskeridou<sup>6</sup>, Francesca Lozar<sup>14</sup>, Alan Maria Mancini<sup>14</sup>, Stefano  
 Dominici<sup>15</sup>, Pierre Moissette<sup>6</sup>, Ildefonso Bajo Campos<sup>16</sup>, Enrico Borghi<sup>17</sup>, George Iliopoulos<sup>18</sup>,  
 Assimina Antonarakou<sup>6</sup>, George Kontakiotis<sup>6</sup>, Evangelia Besiou<sup>6</sup>, Stergios D. Zarkogiannis<sup>19</sup>, Mathias  
 Harzhauser<sup>20</sup>, Francisco Javier Sierro<sup>12</sup>, Angelo Camerlenghi<sup>21</sup>, Daniel García-Castellanos<sup>22</sup>

<sup>1</sup> Department of Geology, University of Vienna, Josef-Holaubek-Platz 2, Geozentrum, 1090 Vienna, Austria

10 <sup>2</sup> Utrecht University, Faculty of Geosciences, Department of Earth Sciences, Vening Meineszgebouw A, Princetonlaan 8a,  
 3584 CB Utrecht, Netherlands

<sup>3</sup> Institute of Evolutionary Biology, University of Warsaw, Krakowskie Przedmieście 26/28, 00-927, Warsaw, Poland

<sup>4</sup> Dipartimento di Scienze, Università Roma Tre, L.go S. Leonardo Murialdo, 1 - 00146 Roma, Italy

<sup>5</sup> Natural History Museum of Basel, Augustinergasse 2, 4001, Basel, Switzerland

15 <sup>6</sup> Department of Historical Geology and Palaeontology, Faculty of Geology and Geoenvironment, National and Kapodistrian  
 University of Athens, Panepistimioupolis Zografou 15784, Athens, Greece

<sup>7</sup> Dipartimento di Scienze Chimiche e Geologiche, Università degli Studi di Modena e Reggio Emilia, Italy

<sup>8</sup> Institute of Marine Science - National Research Council, ISMAR-CNR, Via Gobetti 101, 40129 Bologna, Italy

<sup>9</sup> Stazione Zoologica 'Anton Dohrn', Villa Comunale, Via Caracciolo, 80122, Napoli, Italy

20 <sup>10</sup> Dipartimento di Scienze della Terra, Università di Pisa, Pisa, Italy

<sup>11</sup> Université de Bordeaux /UMR 'EPOC' CNRS 5805, allée Geoffroy St-Hilaire, 33615 Pessac Cedex, France

<sup>12</sup> Department of Geology, University of Salamanca, Plaza de Los Caidos s/n, 37008, Salamanca, Spain

<sup>13</sup> Groningen Institute of Archaeology, University of Groningen, Postsraat 6, 9712, Groningen, the Netherlands

<sup>14</sup> University of Torino, Department of Earth Sciences, Via Valperga Caluso 35, 10125 Torino, Italy

25 <sup>15</sup> Museo di Storia Naturale, Università degli Studi di Firenze, Italy

<sup>16</sup> Sección de Paleontología, Museo de Alcalá de Guadaíra, Seville, Spain

<sup>17</sup> Società Reggiana di Scienza Naturali, Reggio Emilia, Italy

<sup>18</sup> Department of Geology, University of Patras, University Campus, 26504 Rio, Achaia, Greece

<sup>19</sup> Department of Earth Sciences, University of Oxford, Oxford, UK

30 <sup>20</sup> Natural History Museum, Burgring 7, 1010, Vienna, Austria

<sup>21</sup> OGS Istituto Nazionale di Oceanografia e di Geofisica Sperimentale, Trieste, Italy

<sup>22</sup> Geosciences Barcelona, GEO3BCN, CSIC, Solé i Sabarís s/n, Barcelona, Spain

*Correspondence to:* Konstantina Agiadi (konstantina.agiadi@univie.ac.at)

**Abstract.** The Messinian Salinity Crisis and its precursor events have been the greatest environmental perturbation of the  
 35 Mediterranean Sea to date, offering an opportunity to study the response of marine ecosystems to extreme hydrological  
 change and a large-scale biological invasion. The restriction of the marine connection between the Mediterranean and the  
 Atlantic Ocean already since the Tortonian–Messinian boundary resulted in stratification of the water column and increase  
 water temperature and salinity variations. Here, we present a unified and revised marine fossil record of the Mediterranean  
 that covers the Tortonian stage, the pre-evaporitic Messinian and the Zanclean stage and encompasses 22988 occurrences of

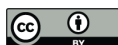

40 calcareous nannoplankton, dinoflagellates, foraminifera, corals, ostracods, bryozoans, echinoids, mollusks, fishes, and  
marine mammals. This record adheres to the FAIR principles, it is updated in terms of taxonomy, and it follows the currently  
accepted stratigraphic framework. Based on this record, knowledge gaps are identified, which are due to spatiotemporal  
inconsistencies in sampling effort and the distribution of sedimentary facies, and the inherent differences in the preservation  
potential between the groups. Additionally, **sampling bias in old records** may have distorted the record in favor of larger,  
45 more impressive taxa within groups. **This record is now ready to be used to answer both geological and biological questions,  
and is amendable when new fossil data are brought to light.**

## **1 Introduction**

The Tortonian–Zanclean was a pivotal period in the evolution of the Mediterranean realm, predominantly due to the changes  
in the marine gateway configurations that affected the hydrological budget and oceanographic conditions in the basin,  
50 leading to the Messinian Salinity Crisis (MSC; Hsü et al., 1973). Even though the Neogene Mediterranean has been one of  
the most intensely researched geoscience topics in the last 150 years, its fossil record is largely fragmented and outdated,  
both in terms of taxonomy **and stratigraphic assignment**. Here, we provide a database of the revised marine fossil record of  
the Mediterranean basin, before and after the MSC. **The fossil record during the MSC has been addressed in previous works**  
**(Carnevale et al., 2019; Carnevale and Schwarzhans, 2022) and is not included here.** This open-access dataset meets **FAIR**  
55 **(findable, accessible, interoperable, and reusable) data standards**. It can be enlarged and amended in the future, to enhance  
our understanding of the response of marine ecosystems to large-scale connectivity changes. It includes marine species  
occurrences in the Mediterranean Sea during the Tortonian age (13.8–7.25 Ma), the pre-MSC Messinian (7.25–5.97 Ma) and  
the Zanclean age (5.33–3.6 Ma) for the following groups: calcareous nannoplankton, dinoflagellates, foraminifera, corals,  
ostracods, bryozoans, echinoids, mollusks, fishes, and marine mammals.

## **2 Dataset structure**

We collected the published fossil records of marine taxa in the Tortonian, the pre-evaporitic Messinian, and the Zanclean  
(Agiadi et al., 2024). For each record, the database includes the name of the taxon as in the original publication, the higher  
taxonomic group and the family it belongs to, the locality where it was found, the relative age of the sediments (separated  
into the three above categories), the publication(s) providing evidence for the occurrence, and the initials of the experts who  
65 collected and input the data (as given in the Authors Contribution statement).

An *Occurrence* was defined by the unique combination of three components: taxon, locality, age. To facilitate future  
analyses at the genus and species levels, since we reported fossil occurrences at all taxonomic levels, we indicated the genus  
and species identification status for each record. When the record was in open nomenclature, we indicated this as uncertain  
(U) identification status of the species and/or the genus. However, when a species was described as a different morphotype,

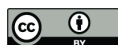

70 but not named as a new species (e.g., sp. 1, sp. A etc.), we treated it as a separate species, if the corresponding expert(s) judged that the fossil material most probably belonged to a different, yet unnamed, species.

*Locality* was the distinct geographical site, where fossils were collected from. Often it was not possible to locate the origin of each record precisely, to the outcrop level, because several records were published many decades ago, and the outcrops had since then been destroyed and the authors are deceased. We therefore retained the most specific information we could find based on the description of the locality in the publication. The coordinates of the localities were obtained either from the occurrence publication or by estimation based on the locality description. Each locality was assigned to one of three regions based on their paleogeographic placement in the Western Mediterranean (wMed), the Eastern Mediterranean (eMed), and the Po Plain–Northern Adriatic (PoA), following the currently accepted paleogeographic data (Amadori et al., 2018; Steininger and Rögl, 1984). The PoA region developed as a paleoceanographic sub-basin of the Mediterranean in the Tortonian–Early Messinian, as evidenced by its distinct strontium isotopic signature (Cornacchia et al., 2021) and the absence of halite deposits. To facilitate comparisons, apart from the Messinian and Zanclean records, we placed also the Tortonian records from Piedmont and the Po Plain within the PoA region. Based on the Late Miocene paleogeographic evolution of Calabria and Sicily (Butler et al., 1995; Caracciolo et al., 2013; Henriquet et al., 2020), we included the records from these areas as part of the eMed, since the marine connection with the wMed was located near its present location, possibly along present southern Sicily (Micallef et al., 2019) or at the Sicily Channel (Malta Plateau; Bache et al., 2012).

The validity of each record was then assessed by the corresponding expert(s), considering changes in the stratigraphic placement of the sedimentary formation from which it derived, new taxon synonymies or reassignment since the publication of the record, and previous misidentifications, leading to a revised name for that record, if necessary. Taxonomy followed the World Register of Marine Species (WoRMS Editorial Board, 2024) and the systematic schemes of: Kroh and Smith (2010) for echinoids; Nelson et al. (Nelson et al., 2016) for fishes; Marx et al. (2016) for cetaceans; and Berta et al. (2018) for pinnipeds. The state of knowledge was accordingly noted in each case, as: E. if the identification was confirmed by the expert based on own sample examination, C. if the identification was confirmed by the expert based on photographs of the material that are available in the literature, R. if the identification was revised by the expert in the present study, and L. if the identification was not confirmed due to lack of access to the fossil material and absence of photographs in the literature, and the record relied only on the literature reference.

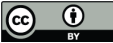

### 3 Fossil record overview

The assembled dataset comprised 22988 occurrences including 4959 species, 1764 genera and 642 families (Table 1; Fig. 1).

**Table 1.** Overview of the collected fossil dataset in the three regions: Eastern Mediterranean (eMed), Western Mediterranean (wMed), Po Plain-Northern Adriatic (PoA). The group ‘other molluscs’ includes scaphopods, chitons and cephalopods.

| Taxonomic group(s)       | # of Occurrences |      |      |      | Species | Genera | Families | # of Localities |      |      |     |
|--------------------------|------------------|------|------|------|---------|--------|----------|-----------------|------|------|-----|
|                          | all              | eMed | wMed | PoA  |         |        |          | all             | eMed | wMed | PoA |
| Marine mammals           | 164              | 65   | 60   | 39   | 26      | 24     | 20       | 114             | 42   | 47   | 25  |
| Sharks                   | 216              | 55   | 110  | 51   | 85      | 56     | 26       | 37              | 7    | 23   | 7   |
| Bony fishes              | 1601             | 365  | 695  | 541  | 426     | 265    | 127      | 70              | 22   | 32   | 16  |
| Gastropods               | 5912             | 1113 | 2056 | 2743 | 1760    | 535    | 150      | 129             | 50   | 36   | 43  |
| Bivalves                 | 3668             | 701  | 2173 | 794  | 479     | 233    | 70       | 161             | 42   | 101  | 18  |
| Bryozoans                | 833              | 319  | 514  | 0    | 265     | 170    | 83       | 6               | 3    | 3    | 0   |
| Echinoids                | 217              | 27   | 173  | 17   | 109     | 38     | 22       | 42              | 12   | 22   | 8   |
| Corals                   | 902              | 235  | 514  | 153  | 133     | 57     | 23       | 242             | 73   | 149  | 20  |
| Ostracods                | 4500             | 2215 | 938  | 1347 | 1086    | 168    | 29       | 124             | 59   | 37   | 29  |
| Other molluscs           | 191              | 26   | 53   | 112  | 77      | 30     | 16       | 23              | 10   | 2    | 11  |
| Benthic foraminifera     | 560              | 202  | 233  | 125  | 117     | 62     | 42       | 20              | 6    | 10   | 4   |
| Planktic foraminifera    | 1306             | 651  | 468  | 187  | 97      | 17     | 3        | 79              | 37   | 29   | 13  |
| Dinoflagellate cysts     | 1016             | 599  | 300  | 117  | 174     | 70     | 13       | 38              | 20   | 17   | 2   |
| Calcareous nannoplankton | 1902             | 922  | 707  | 273  | 125     | 40     | 18       | 56              | 26   | 20   | 10  |
| Total                    | 22988            | 7495 | 8994 | 6499 | 4959    | 1765   | 642      | 836             | 279  | 424  | 135 |

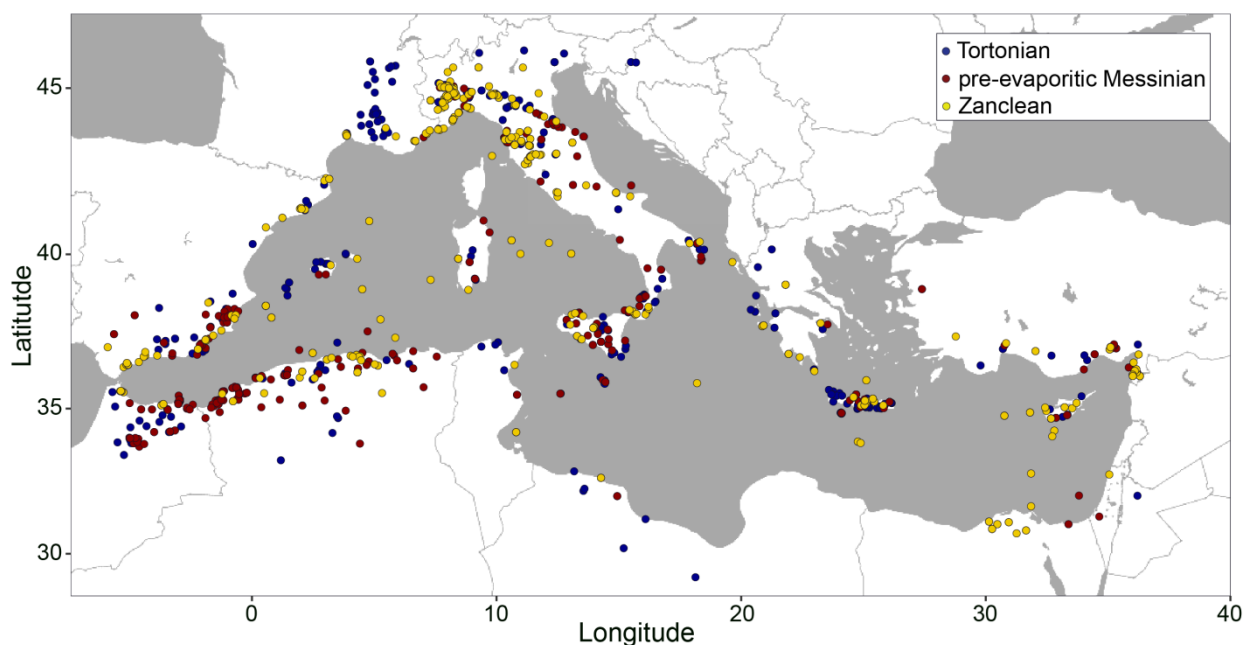

**Figure 1.** Mediterranean map with the localities included in this record. The coordinates of the localities were obtained from the original publications, whenever possible. When the exact coordinates for a locality had not been published or when the locality was too vague (e.g. Libya), we included approximate coordinates based on the description of the locality in the original publication.

The map was produced using ggmap (Kahle and Wickham, 2013).

#### 4 Record gaps

Some gaps are detected in the fossil record. Spatiotemporal gaps are attributed to: a) the spatial distribution of outcrops of Late Miocene–Early Pliocene deposits (Masclé and Masclé, 2012); and b) socioeconomic and political conditions favoring research in the northwestern Mediterranean countries (Cappelletto and et al., 2021). The spatial distribution of the localities within the Mediterranean is strongly skewed toward the West and the North (Fig. 1; e.g., for molluscs Monegatti and Raffi, 2010). However, there are notable exceptions. For example, most Tortonian data on gastropods derive from the eastern Mediterranean, whereas almost all Messinian and Zanclean localities are in the western sub-basin or the Po Plain–Northern Adriatic region. On the other hand, rarity is inherent in the fossil record of large animals. Only a single diverse shark tooth assemblage is currently known from the pre-evaporitic Messinian of the Mediterranean Basin, from the vicinities of Oran (Algeria; Arambourg, 1927). Similarly, the fossil record of pinnipeds from the Late Miocene–Early Pliocene of the Mediterranean Basin only consists of two Monachinae (Phocidae) species: *Messiphoca mauritanica* from the Messinian (during the MSC) of Algeria (Muizon, 1981) and fragmentary remains referred of *Pliophoca* cf. *etrusca* from southern France, Italy and Spain (Berta et al., 2015).

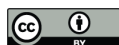

Moreover, large species, especially those with more robust remains, have generally been favored in the fossil record of some groups, such as molluscs, as they were generally easier to sample (Dominici et al., 2020). This was in spite of the fact that a large proportion of the species in modern biodiversity hotspots are smaller than 4 mm (Bouchet et al., 2002). Particularly for the case of molluscs, bivalves, contrary to gastropods, include calcitic forms that have a higher preservation potential than aragonitic forms. In contrast to gastropods, there are many more pre-evaporitic Messinian localities with rich bivalve faunas than either Tortonian and Zanclean localities. This is largely due to a few large expeditions in North Africa (Cornée et al., 2014; el Kadiri et al., 2010; Merzeraud et al., 2019), which yielded however only faunal lists of large-sized, mostly calcitic forms extracted from calcarenites, a lithology underrepresented in Zanclean collections (Dominici and Forli, 2021; Dominici et al., 2019).

Important gaps in the Late Miocene–Early Pliocene marine fossil record of the Mediterranean derive from the uneven distribution of the different facies. This affects especially the records of benthic organisms, whose distribution depends on the type of substratum. In the case of molluscs, knowledge of the onshore-offshore facies gradient is **fragmentary** (Dominici and Forli, 2021; Dominici et al., 2019). As a result, for gastropods, Tortonian and Zanclean data represent a wider facies range, from onshore to offshore siliciclastic, whereas the pre-evaporitic Messinian data are mainly confined to open shelf mudstones, **so that littoral and bathyal taxa of the pre-evaporitic Messinian may be underrepresented in the database.** Moreover, the Messinian mollusc data include records from hybrid carbonates (e.g., Dominici et al., 2019), which are lacking in the Zanclean (Dominici and Forli, 2021). Such gaps do not appear consistently across groups, however: for ostracods, both shallow and deeper siliciclastic facies are represented from the three geographic areas and the three stratigraphic intervals, rendering the dataset rather more complete.

Regarding stratigraphic gaps, the main issue when assembling the dataset derived from the fact that in some cases the chronostratigraphic framework provided in the initial publication is **considered questionable** (e.g., Benson, 1976; Doruk, 1979; Sissingh, 1972). Additionally, several new species were established without either descriptions or illustrations (*nomina nuda*; Doruk, 1979). In the case of echinoids for example, many finding localities in the rich Italian Pliocene are generically reported in the geologic maps and publications as ‘Zanclean–Piacenzian’, thus preventing the precise temporal collocation of numerous citations from the Argille Azzurre Formation of the PoA region (e.g., Airaghi, 1901; Botto-Micca, 1896) and from Tuscany (e.g., Desor, 1858; Meneghini, 1862). There are two different problems here: old citations rarely indicated the precise stratigraphic position, whereas several precise layers yielding echinoids **have not been studied (and dated) yet by** modern methods. For the Pliocene, records were only included in the database if they could be securely placed in the Zanclean based on the current knowledge on the stratigraphic placement of the deposits they were recovered from. The result is a limited record for the Messinian and possibly the Zanclean, both potentially leading to an underestimation of echinoid diversity.

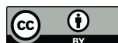

## 155 Data availability

The dataset described in the paper is openly accessible under a CC BY license at <https://doi.org/10.5281/zenodo.10782429> (Agiadi et al., 2024).

## Code availability

No code was used for assembling the database. The code to generate Table 1 and Figure 1 is available at  
160 <https://zenodo.org/doi/10.5281/zenodo.10782634>.

## 5 Conclusions and Outlook

This dataset includes a Tortonian–Zanclean marine fossil record of the Mediterranean before and after the Messinian Salinity Crisis. The Late Miocene–Early Pliocene Mediterranean fossil record is invaluable, not only for large-scale paleobiogeographic studies, but also for evaluating the indigenous/non-indigenous status of tropical marine species detected  
165 today in the eastern Mediterranean, establishing resilience thresholds for marine organisms and their ecosystems, and investigating evolutionary dynamics, particularly of higher trophic-level groups. Nevertheless, we highlight the need for further targeted sampling expeditions and collaborative paleontological investigations facilitated by science diplomacy (Soler and Perez-Porro, 2021) to fill in these spatial gaps in the fossil record of the Mediterranean.

## Author contribution

170 **Konstantina Agiadi**: Conceptualization, Data curation, Funding acquisition, Investigation (data collection: osteichthyes), Methodology, Project administration, Writing – original draft preparation. **Niklas Hohmann**: Data curation, Formal analysis, Methodology, Writing – review & editing. **Elsa Gliozzi**: Investigation (data collection: ostracods), Writing – review & editing. **Danae Thivaoui**: Data curation, Investigation (data collection: bivalves, gastropods), Writing – review & editing. **Francesca Bosellini**: Investigation (data collection: corals), Writing – review & editing. **Marco Taviani**:  
175 Investigation (data collection: corals), Writing – review & editing. **Giovanni Bianucci**: Investigation (data collection: marine mammals), Writing – review & editing. **Alberto Collareta**: Investigation (data collection: sharks), Writing – review & editing. **Laurent Londeix**: Investigation (data collection: dinoflagellates), Writing – review & editing. **Costanza Faranda**: Investigation (data collection: ostracods), Writing – review & editing. **Francesca Bulian**: Investigation (data collection: benthic foraminifera), Writing – review & editing. **Efterpi Koskeridou**: Investigation (data collection: bivalves,  
180 gastropods), Writing – review & editing. **Francesca Lozar**: Investigation (data collection: calcareous nannoplankton), Writing – review & editing. **Alan Maria Mancini**: Investigation (data collection: calcareous nannoplankton), Writing – review & editing. **Stefano Dominici**: Investigation (data collection: bivalves, gastropods), Writing – review & editing.





**Pierre Moissette**: Investigation (data collection: bryozoans), Writing – review & editing. **Ildefonso Bajo Campos**: Investigation (data collection: echinoids), Writing – review & editing. **Enrico Borghi**: Investigation (data collection: echinoids), Writing – review & editing. **George Iliopoulos**: Investigation (data collection: marine mammals), Writing – review & editing. **Assimina Antonarakou**: Investigation (data collection: planktic foraminifera), Writing – review & editing. **George Kontakiotis**: Investigation (data collection: planktic foraminifera), Writing – review & editing. **Evangelia Besiou**: Investigation (data collection: planktic foraminifera), Writing – review & editing. **Stergios D. Zarkogiannis**: Investigation (data collection: planktic foraminifera), Writing – review & editing. **Mathias Harzhauser**: Investigation (data collection: bivalves, gastropods), Writing – review & editing. **Francisco Javier Sierro Sánchez**: Investigation (data collection: benthic foraminifera), Writing – review & editing. **Angelo Camerlenghi**: Conceptualization, Funding acquisition, Writing – review & editing. **Daniel García-Castellanos**: Conceptualization, Funding acquisition, Writing – review & editing.

### Competing interests

The authors declare that they have no conflict of interest.

### Acknowledgements

Collaboration for this research was facilitated by the COST Action CA15103 “Uncovering the Mediterranean salt giant” (2016–2020). This research was funded in whole, or in part, by the Austrian Science Fund (FWF) Grant DOI 10.55776/V986. For the purpose of open access, the author has applied a CC BY public copyright license to any Author Accepted Manuscript version arising from this submission. This is Ismar-CNR, Bologna, scientific contribution n. 2090. Konstantina Agiadi was supported for this work by Greek national funds and the European Social Fund through the action “Postdoctoral Research Fellowships” of the Greek National Scholarships Foundation, project “Comparative study of the Messinian Salinity Crisis effect on the eastern Ionian and northern Aegean ichthyofauna” (2017–2019). Elsa Gliozzi and Costanza Faranda were funded by MIUR-Italy, Department of Excellence grant, Article 1, Paragraph 337, law 232/2016. This study was partially funded by the European Commission through ITN SaltGiant (Horizon2020-765256).

### References

Agiadi, K., Hohmann, N., Gliozzi, E., Thivaïou, D., Francesca, B., Taviani, M., Bianucci, G., Collareta, A., Londeix, L., Faranda, C., Bulian, F., Koskeridou, E., Lozar, F., Mancini, A. M., Dominici, S., Moissette, P., Bajo Campos, I., Borghi, E., Iliopoulos, G., Antonarakou, A., Kontakiotis, G., Besiou, E., Zarkogiannis, S. D., Harzhauser, M., Sierro, F., Camerlenghi,



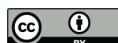

- 210 A., and Garcia-Castellanos, D.: Revised marine fossil record of the Mediterranean before and after the Messinian Salinity Crisis, <https://doi.org/10.5281/zenodo.10782429>, 2024.
- Airaghi, C.: Echinidi terziari del Piemonte e della Liguria, *Palaeontol. Ital.*, 7, 22–126, 1901.
- Amadori, C., Garcia-Castellanos, D., Toscani, G., Sternai, P., Fantoni, R., Ghielmi, M., and Giulio, A. D.: Restored topography of the Po Plain-Northern Adriatic region during the Messinian base-level drop—Implications for the
- 215 physiography and compartmentalization of the palaeo-Mediterranean basin, *Basin Res.*, 30, 1247–1263, <https://doi.org/10.1111/bre.12302>, 2018.
- Arambourg, C.: Les poissons fossiles d’Oran, *Matér. Pour Carte Géologique L’Algérie*, 6, 1–218, 1927.
- Bache, F., Popescu, S.-M., Rabineau, Gorini, C., Suc, J.-P., Clauzon, G. f, Olivet, J.-L., Rubino, J.-L., Melinte-Dobrinescu, M. C., Estrada, F., Londeix, L., Armijo, R., Meyer, B., Jolivet, L., Jouannic, G., Leroux, E., Aslanian, D., Reis, A. T. D.,
- 220 Mocochain, L., Dumurdžanov, N., Zagorchev, I., Lesić, V., Tomić, D., Namik Çağatay, M., Brun, J.-P., Sokoutis, D., Csato, I., Uçarkus, G., and Çakir, Z.: A two-step process for the reflooding of the Mediterranean after the Messinian Salinity Crisis, *Basin Res.*, 24, 125–153, <https://doi.org/10.1111/j.1365-2117.2011.00521.x>, 2012.
- Benson, R. H.: Miocene deep-sea ostracodes of the Iberian Portal and the Balearic Basin, *Mar. Micropaleontol.*, 1, 249–262, [https://doi.org/10.1016/0377-8398\(76\)90010-4](https://doi.org/10.1016/0377-8398(76)90010-4), 1976.
- 225 Berta, A., Kienle, S., Bianucci, G., and Sorbi, S.: A Reevaluation of *Pliophoca Etrusca* (Pinnipedia, Phocidae) from the Pliocene of Italy: Phylogenetic and Biogeographic Implications, *J. Vertebr. Paleontol.*, 35, e889144, <https://doi.org/10.1080/02724634.2014.889144>, 2015.
- Berta, A., Churchill, M., and Boessenecker, R. W.: The Origin and Evolutionary Biology of Pinnipeds: Seals, Sea Lions, and Walruses, *Annu. Rev. Earth Planet. Sci.*, 46, null, <https://doi.org/10.1146/annurev-earth-082517-010009>, 2018.
- 230 Botto-Micca, L.: Contributo allo studio degli echinidi terziarii del Piemonte, *Bolletino Soc. Geol. Ital.*, 15, 311–374, 1896.
- Bouchet, P., Lozouet, P., Maestrati, P., and Heros, V.: Assessing the magnitude of species richness in tropical marine environments: exceptionally high numbers of molluscs at a New Caledonia site, *Biol. J. Linn. Soc.*, 75, 421–436, <https://doi.org/10.1046/j.1095-8312.2002.00052.x>, 2002.
- Butler, R. W. H., Lickorish, W. H., Grasso, M., Pedley, H. M., and Ramberti, L.: Tectonics and sequence stratigraphy in
- 235 Messinian basins, Sicily: constraints on the initiation and termination of the Mediterranean salinity crisis, *Geol. Soc. Am. Bull.*, 107, 425–439, [https://doi.org/10.1130/0016-7606\(1995\)107<0425:TASSIM>2.3.CO;2](https://doi.org/10.1130/0016-7606(1995)107<0425:TASSIM>2.3.CO;2), 1995.
- Cappelletto, M. and et al.: The Mediterranean Sea we want, *Ocean Coast. Res.*, 69, e21031, 2021.
- Caracciolo, L., Gramigna, P., Critelli, S., Calzona, A. B., and Russo, F.: Petrostratigraphic analysis of a Late Miocene mixed siliciclastic–carbonate depositional system (Calabria, Southern Italy): Implications for Mediterranean paleogeography,
- 240 *Sediment. Geol.*, 284–285, 117–132, <https://doi.org/10.1016/j.sedgeo.2012.12.002>, 2013.
- Carnevale, G. and Schwarzhans, W.: Marine life in the Mediterranean during the Messinian salinity crisis: a paleoichthyological perspective, *Riv. Ital. Paleontol. E Stratigr.*, 128, <https://doi.org/10.54103/2039-4942/15964>, 2022.

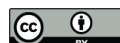

- Carnevale, G., Gennari, R., Lozar, F., Natalicchio, M., Pellegrino, L., and Dela Pierre, F.: Living in a deep desiccated Mediterranean Sea: An overview of the Italian fossil record of the Messinian salinity crisis, *Bolletino Della Soc. Paleontol. Ital.*, 58, 109–140, 2019.
- Cornacchia, I., Brandano, M., and Agostini, S.: Miocene paleoceanographic evolution of the Mediterranean area and carbonate production changes: A review, *Earth-Sci. Rev.*, 221, 103785, <https://doi.org/10.1016/j.earscirev.2021.103785>, 2021.
- Cornée, J.-J., Münch, P., Melinte-Dobrinescu, M., Moussa, A. B., Quillévéré, F., Drinia, H., Azdimousa, A., Touhami, A. O., Merzeraud, G., Fauquette, S., Corsini, M., Moissette, P., and Feddi, N.: The Early Pliocene reflooding in the Western Mediterranean: New insights from the rias of the Internal Rif, Morocco, *Comptes Rendus - Geosci.*, 346, 90–98, <https://doi.org/10.1016/j.crte.2014.03.002>, 2014.
- Desor, E.: *Synopsis des échinides fossiles*, Reinwald editions, Paris, 490 pp., 1858.
- Dominici, S. and Forli, M.: Lower Pliocene molluscs from southern tuscany (Italy), *Boll. Della Soc. Paleontol. Ital.*, 60, 69–98, <https://doi.org/10.4435/BSPI.2021.04>, 2021.
- Dominici, S., Benvenuti, M., Forli, M., Bogi, C., and Guerrini, A.: Upper Miocene molluscs of Monti Livornesi (Tuscany, Italy): Biotic changes across environmental gradients, *Palaeogeogr. Palaeoclimatol. Palaeoecol.*, 527, 103–117, <https://doi.org/10.1016/j.palaeo.2019.04.024>, 2019.
- Dominici, S., Forli, M., Bogi, C., Guerrini, A., and Benvenuti, M.: Paleobiology from museum collections: Comparing historical and novel data on upper Miocene molluscs of the Livorno Hills, *Riv. Ital. Paleontol. E Stratigr.*, 126, 65–109, <https://doi.org/10.13130/2039-4942/13006>, 2020.
- Doruk, N.: Neogene and Quaternary Ostracoda of Adana and Antakya Basin (Turkey). In: Krstic, N. (Ed.), *Taxonomy, biostratigraphy and distribution of Ostracodes*, Serbian Geological Society, Belgrade, 165–172, 1979.
- Henriquet, M., Dominguez, S., Barreca, G., Malavieille, J., and Monaco, C.: Structural and tectono-stratigraphic review of the Sicilian orogen and new insights from analogue modeling, *Earth-Sci. Rev.*, 208, 103257, <https://doi.org/10.1016/j.earscirev.2020.103257>, 2020.
- Hsü, K. J., Ryan, W. B. F., and Cita, M. B.: Late Miocene Desiccation of the Mediterranean, *Nature*, 242, 240–244, <https://doi.org/10.1038/242240a0>, 1973.
- el Kadiri, K., Serrano, F., Guerra, A., Hlila, R., and Sanz de Galdeano, C.: The Malalyine Pliocene succession (NE Rif, Morocco): sequence stratigraphy and regional correlation, *Rev Soc Geol Esp.*, 23, 57–67, 2010.
- Kahle, D. and Wickham, H.: ggmap: Spatial Visualization with ggplot2, *R J.*, 5, 144–161, 2013.
- Kroh, A. and Smith, A. B.: The phylogeny and classification of post-Palaeozoic echinoids, *J. Syst. Palaeontol.*, 8, 147–212, <https://doi.org/10.1080/14772011003603556>, 2010.
- Marx, F. G., Lambert, O., and Uhen, M. D.: *Cetacean paleobiology*, John Wiley & Sons, Inc., 306 pp., 2016.
- Masclé, J. and Masclé, G.: *Geological and morpho-tectonic map of the Mediterranean domain*, CCGM/CGMW, Paris, 2012.



- Meneghini, G.: Studi sugli Echinodermi fossili neogenici di Toscana, in: Lazzari, L. (Ed.) Siena e il suo Territorio. Tipografia del Regio Istituto dei Sordo-Mutti, Siena, 61–89, 1862.
- Merzeraud, G., Achalhi, M., Cornee, J., Munch, P., Azdimousa, A., and Ben Moussa, A.: Sedimentology and sequence stratigraphy of the late-Messinian - Early pliocene continental to marine deposits of the Boudinar basin (North Morocco), *J. Afr. Earth Sci.*, 150, 205–223, <https://doi.org/10.1016/j.jafrearsci.2018.11.002>, 2019.
- Micallef, A., Camerlenghi, A., Georgiopoulou, A., Garcia-Castellanos, D., Gutscher, M.-A., Lo Iacono, C., Huvenne, V. A. I., Mountjoy, J. J., Paull, C. K., Le Bas, T., Spatola, D., Facchin, L., and Accettella, D.: Geomorphic evolution of the Malta Escarpment and implications for the Messinian evaporative drawdown in the eastern Mediterranean Sea, *Geomorphology*, 327, 264–283, <https://doi.org/10.1016/j.geomorph.2018.11.012>, 2019.
- 285 Monegatti, P. and Raffi, S.: The Messinian marine molluscs record and the dawn of the eastern Atlantic biogeography, *Palaeogeogr. Palaeoclimatol. Palaeoecol.*, 297, 1–11, <https://doi.org/10.1016/j.palaeo.2010.06.023>, 2010.
- Muizon, C. de: Premier signalement de Monachinae (Phocidae: Mammalia) dans le Sahelien (Miocene superieur) d’Oran (Algerie), *Palaeovertebrata*, 11, 181–196, 1981.
- Nelson, J.S., Grande, T.C., Wilson, M.V.H.: *Fishes of the World*, 5th Edition, John Wiley & Sons Inc., 752 pp., 2018.
- 290 Sissingh, W.: Late Cenozoic ostracoda of the south Aegean island arc, *Utrecht Micropaleontol. Bull.*, 6, 1–163, 1972.
- Soler, M. G. and Perez-Porro, A.: *Science and Innovation Diplomacy in the Mediterranean*, Union for the Mediterranean, Barcelona, 2021.
- Steininger, F. F. and Rögl, F.: Paleogeography and palinspastic reconstruction of the Neogene of the Mediterranean and Paratethys, *Geol. Soc. Lond. Spec. Publ.*, 17, 659–668, <https://doi.org/10.1144/GSL.SP.1984.017.01.52>, 1984.
- 295 WoRMS Editorial Board: *World Register of Marine Species*, 2024.
